# Supplementary material
Source: PubMed Central journal article supplement (PMC5934778)
Supplement: EMBR-19-e45124-s001.pdf [file EMBR-19-e45124-s001.pdf]

---

|                                       |
|---------------------------------------|
| <b>CONTENS OF APPENDIX</b>            |
| <b>APPENDIX FIGURES LEGEND S1-S14</b> |
| <b>APPENDIX FIGURES S1-S14</b>        |
| <b>APPENDIX TABLE S1, S2</b>          |

---

## APPENDIX FIGURES LEGEND

### Appendix Figure S1. Generation of Huh7 stable cells with *SIRT5* knockdown

#1 and #2 refer to two different shRNAs against *SIRT5* as described in Material and Methods. The indicated endogenous proteins were detected by western-blotting. Related to Figure 1A.

### Appendix Figure S2. *SIRT5* knockdown induces oxidative DNA damage in HepG2 cells

**(A)** Knockdown of *SIRT5* induces oxidative DNA damage response. In HepG2 cells with stable *SIRT5* knockdown, the indicated classical oxidative DNA damage response markers were determined by western blot analysis. #1 and #2 refer to two different shRNAs against *SIRT5* as described in Material and Methods.

**(B)** Knockdown of *SIRT5* increases cellular ROS. In HepG2 cells with stable *SIRT5* knockdown, ROS level was determined in cell extracts as described in Material and Methods.

Data information: Shown are average values with standard deviation (S.D.) of triplicated experiments. \*denotes the  $p < 0.05$ , \*\*denotes the  $p < 0.01$ , and \*\*\*denotes the  $p < 0.001$  for the indicated comparisons by two-tailed unpaired Student's *t*-test.

Related to Figure 1B.

### Appendix Figure S3. Identification of the specificity of *SIRT5* antibody

In HEK293T cells with stable *SIRT5* knockdown, immunofluorescence staining was performed to detect endogenous *SIRT5* using the antibody against *SIRT5* as

---

described in Materials and Methods. Representative immunofluorescence images (original magnification, 40 x; a single focal plane, scale bar, 20  $\mu$ m) are shown.

**Appendix Figure S4. *SIRT5* knockdown does not affect the catalase activity**

In HepG2 stable cells with *SIRT5* knockdown, the catalase activity was measured using a commercial kit as described in Material and Methods. Shown are average values with standard deviation (S.D.) of triplicated experiments. n.s.=not significant.

**Appendix Figure S5. *SIRT5* is co-localized with ACOX1**

Immunofluorescence staining was performed in HeLa cells overexpressing HA-*SIRT5*, and the indicated proteins were detected using the indicated antibodies as described in Materials and Methods. Representative immunofluorescence images (original magnification, 630 x; a single focal plane, scale bar, 5  $\mu$ m) are shown.

**Appendix Figure S6. *SIRT5* knockdown increases lysine succinylation of ACOX1**

Flag-ACOX1 was overexpressed in *SIRT5* knockdown HEK293T cells, and was then purified by IP with Flag beads, followed by western blot to detect the indicated post-translational modifications of Flag-ACOX1 as described in Materials and Methods. Related to Figure 2C.

**Appendix Figure S7. H158Y mutation in *SIRT5* does not affect its interaction**

---

**with ACOX1**

Flag-ACOX1 was co-expressed with HA-SIRT5 or HA-SIRT5<sup>H158Y</sup> in HEK293T cells. Proteins were purified by IP with Flag beads, followed by western blot to detect SIRT5 or SIRT5<sup>H158Y</sup> with an HA antibody. Related to Figure 2E.

**Appendix Figure S8. Verification of the methodology for ACOX1 activity assay**

In HepG2 stable cells with *ACOX1* knockdown, the ACOX1 activity in whole cell lysate ( $\sim 1 \times 10^5$  cells) was measured as described in Material and Methods.

Data information: Shown are average values with standard deviation (S.D.) of triplicated experiments. \*denotes the  $p < 0.05$ , \*\*denotes the  $p < 0.01$ , and \*\*\*denotes the  $p < 0.001$  for the indicated comparisons by two-tailed unpaired Student's *t*-test

**Appendix Figure S9. SDHA knockdown changes the cellular concentrations of succinate and fumarate**

**(A-B)** In HepG2 cells with stable *SDHA* knockdown, metabolites were extracted, and the intracellular levels of fumarate **(A)** and succinate **(B)** were determined by GC-MS analysis as described in Materials and Methods. Shown are average values with standard deviation (S.D.) of triplicated experiments. #1 and #2 refer to two different shRNAs against *SDHA* as described in Material and Methods. Related to Figures 3E-F.

**Appendix Figure S10. Succinylation of multiple lysine residues affects ACOX1**

---

**activity**

The indicated K-to-R mutants of Flag-ACOX1 were overexpressed in HEK293T cells, and the ectopically expressed proteins were purified by IP with Flag beads, followed by ACOX1 activity assay as described in Materials and Methods. Shown are average values with standard deviation (S.D.) of triplicated experiments.

**Appendix Figure S11. *SIRT5* knockdown does not change the ERK/AKT phosphorylation pathway**

In HepG2 stable cells with *SIRT5* knockdown, the indicated proteins were determined by western blot analysis using the indicated antibodies as described in Materials and Methods.

**Appendix Figure S12. *SIRT5*-regulated succinylation activates ACOX1 and promotes anchorage-independent cell growth in HepG2 liver cells**

The capability of stable HepG2 cells with single or double knockdown of *SIRT5/ACOX1* to exhibit anchorage-independent growth was determined by soft-ager colony formation assay as described in Material and Methods. Related to Figures 5D-E.

**Appendix Figure S13. Single or double knockdown of *SDHA/ACOX1* does not change the ERK/AKT phosphorylation pathway**

In HepG2 stable cells with single or double knockdown of *SDHA/ACOX1*, the

---

indicated proteins were determined by western blot analysis using the indicated antibodies as described in Material and Methods.

**Appendix Figure S14.  $\gamma$ H2AX is broadly increased in HCC tumors**

**(A-B)** In a study cohort consisting of 118 HCC patients,  $\gamma$ H2AX protein was detected by IHC staining as described in Material and Methods. Representative images (original magnification, 200 x; scale bar, 50  $\mu$ m) are shown **(A)**. Quantification of  $\gamma$ H2AX IHC analysis is present in **(B)**.

Data information: \*denotes the  $p < 0.05$ , \*\*denotes the  $p < 0.01$ , and \*\*\*denotes the  $p < 0.001$  for the indicated comparisons by two-tailed unpaired Student's *t*-test. Related to Figure 6E.

**Appendix Figure S1. Generation of Huh7 stable cells with *SIRT5* knockdown**

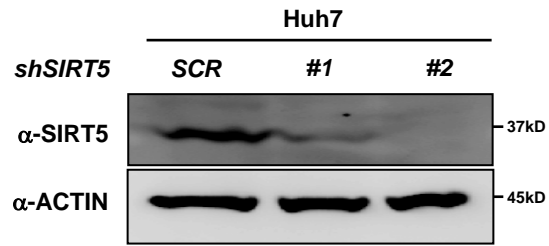

Appendix Figure S2. *SIRT5* knockdown induces oxidative DNA damage in HepG2 cells

A

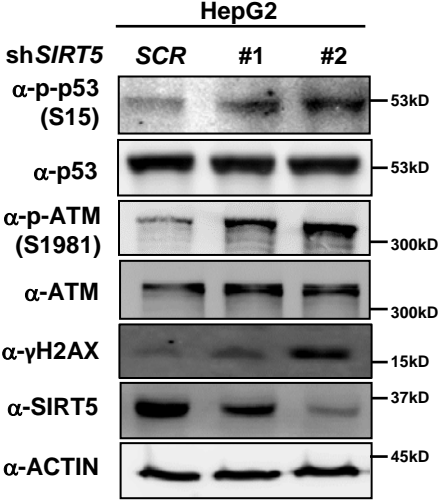

B

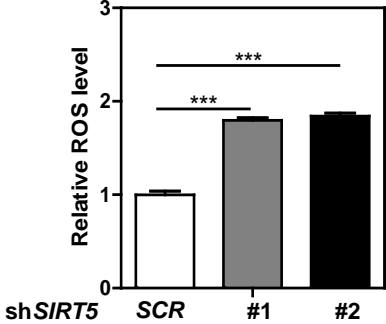



Appendix Figure S3. Identification of the specificity of SIRT5 antibody

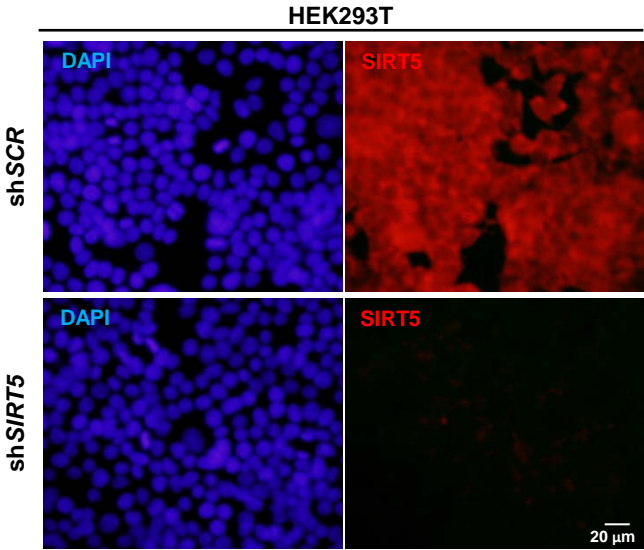

Appendix Figure S4. *SIRT5* knockdown does not affect the catalase activity in HepG2 cells

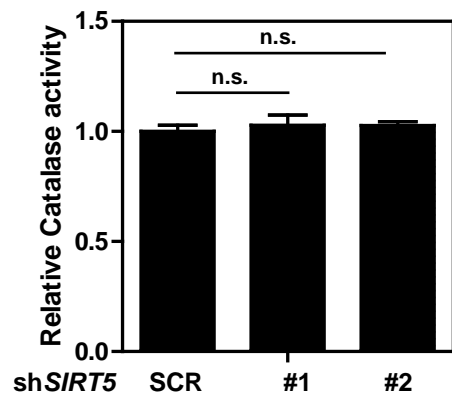

Appendix Figure S5. Co-localization of SIRT5 and ACOX1 in cells

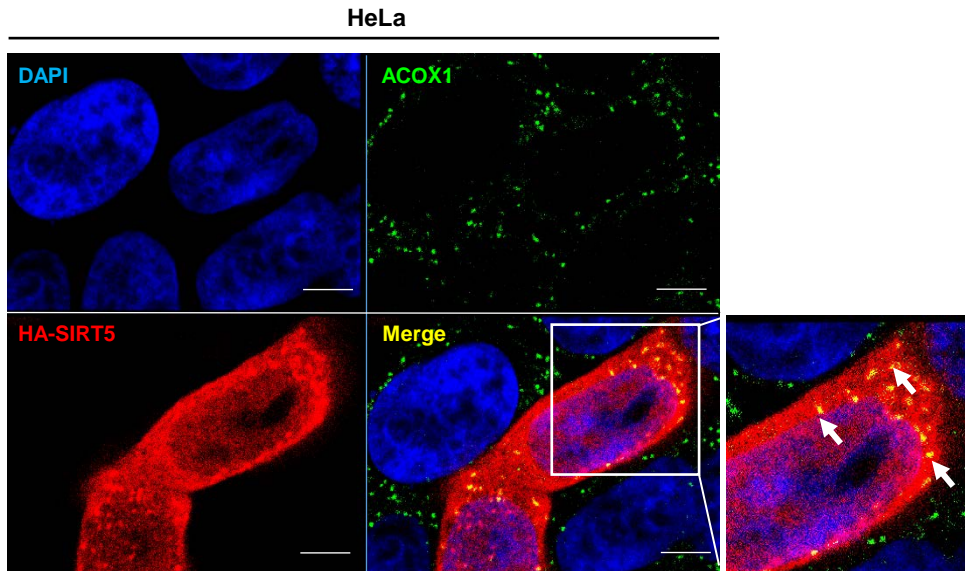

Appendix Figure S6. *SIRT5* knockdown increases the lysine succinylation level of ACOX1

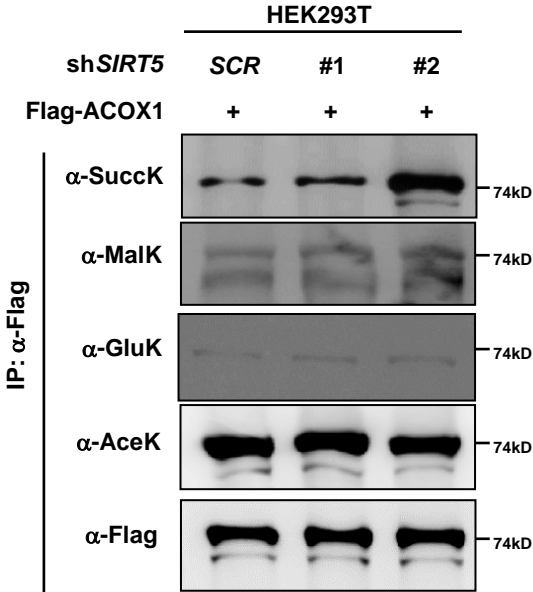

Appendix Figure S7. H158Y mutation in SIRT5 does not affect its interaction with ACOX1

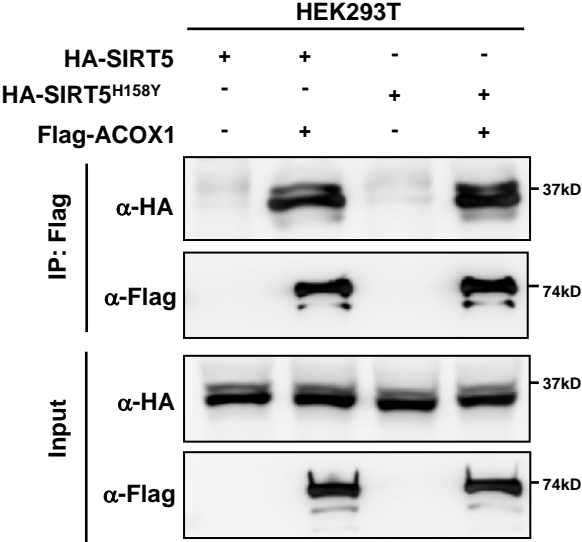

Appendix Figure S8. Verification of the methodology for ACOX1 activity assay

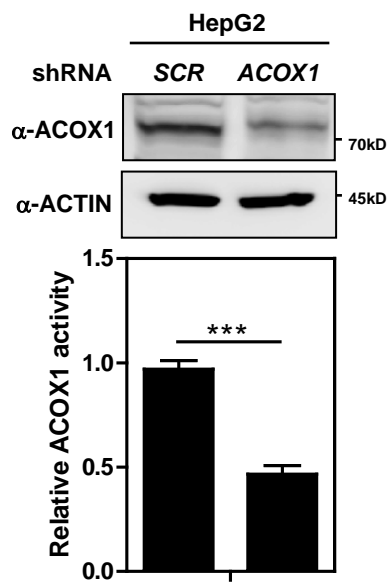

**Appendix Figure S9. *SDHA* knockdown changes the cellular concentrations of succinate and fumarate in HepG2 liver cells**

**A**

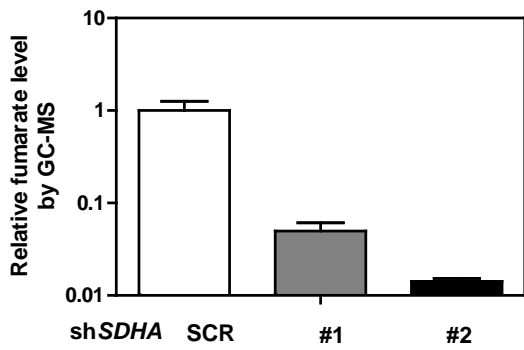

**B**

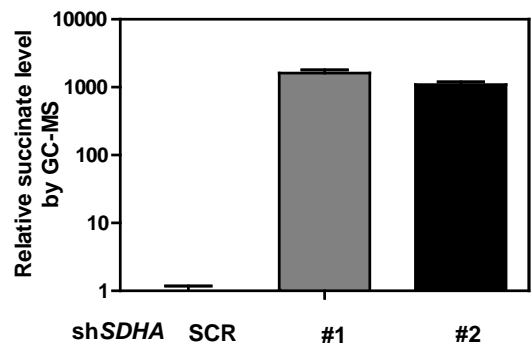

## Appendix Figure S10. Succinylation of multiple lysine residues affects ACOX1 activity

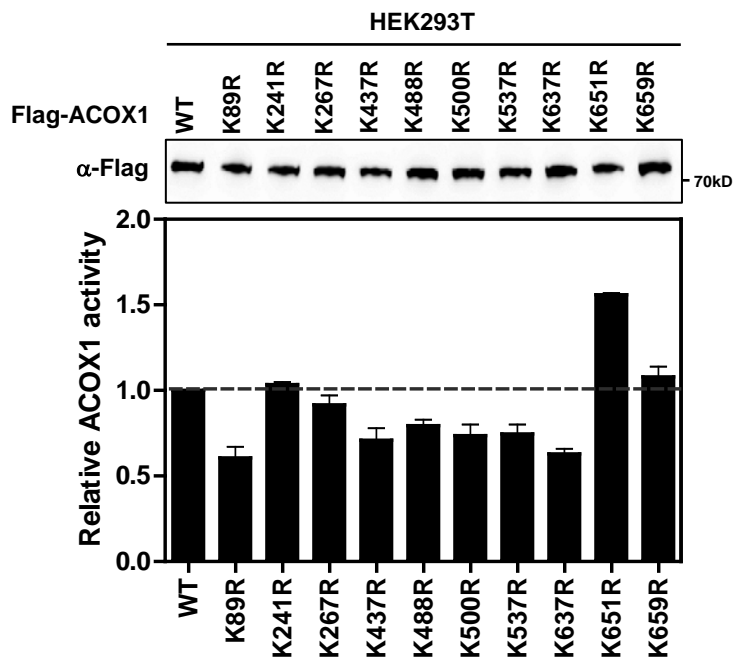



**Appendix Figure S11. The ERK/AKT phosphorylation pathway is not affected by *SIRT5* knockdown in HepG2 liver cells**

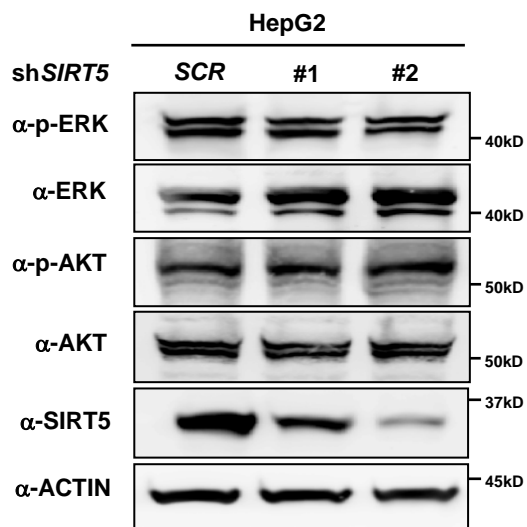

**Appendix Figure S12. SIRT5-regulated succinylation activates ACOX1 to promote anchorage-independent cell growth in HepG2 liver cells**

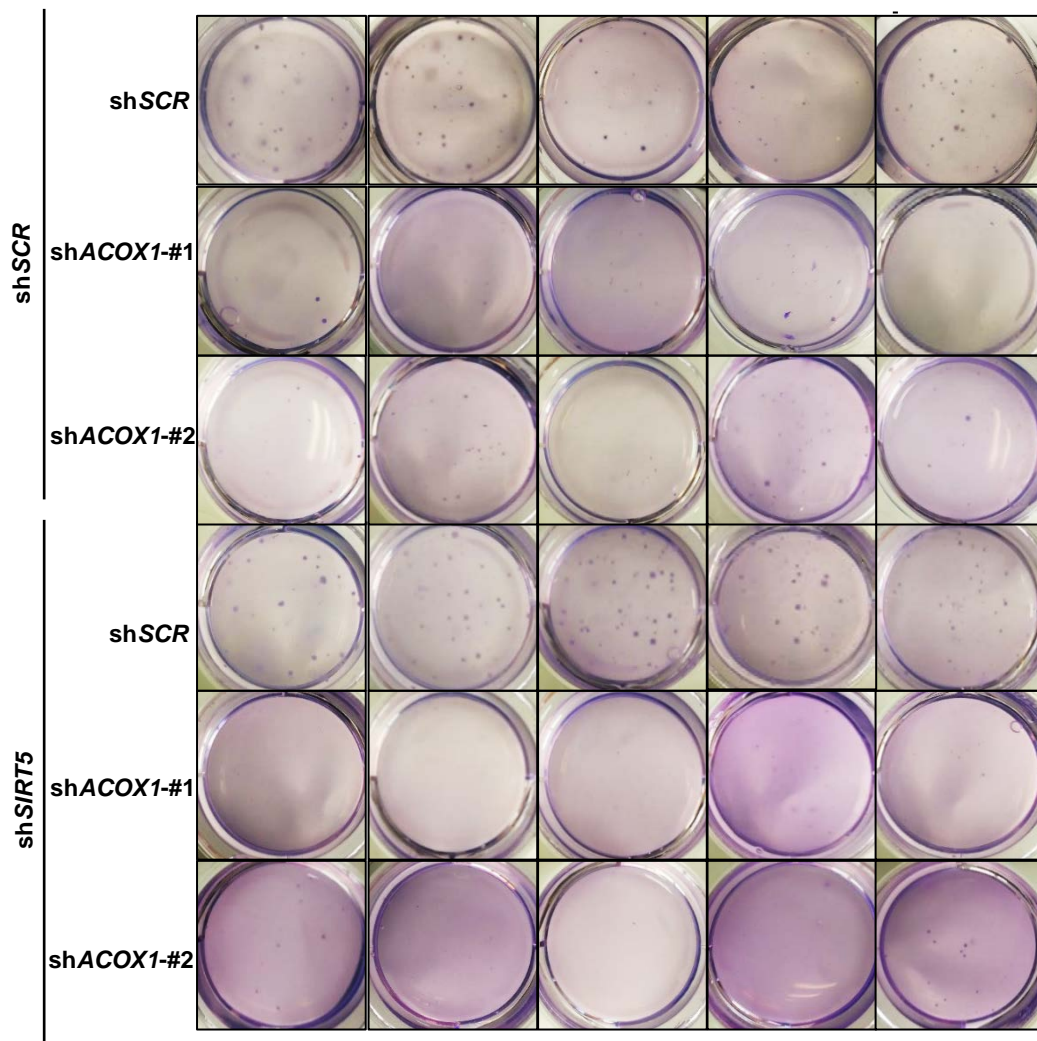

**Appendix Figure S13. The ERK/AKT phosphorylation pathway is not affected by single or double knockdown of *SDHA/ACOX1* in HepG2 liver cells**

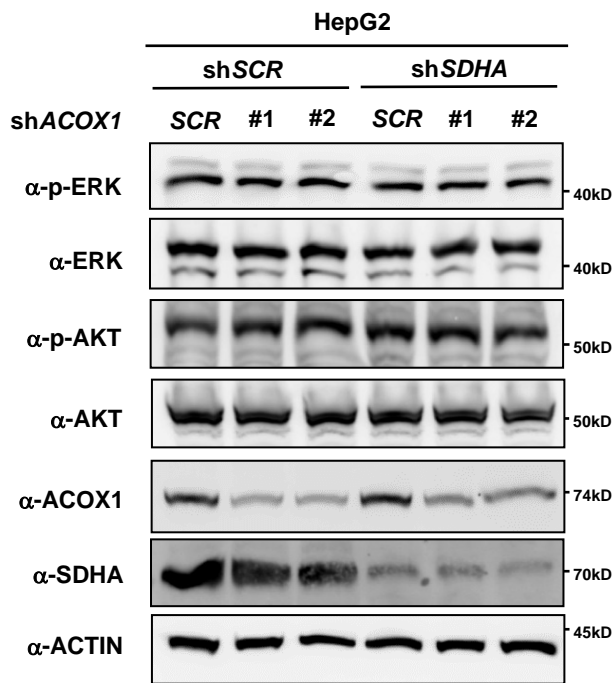

# Appendix Figure S14. $\gamma$ H2AX is broadly increased in HCC tumors

**A**

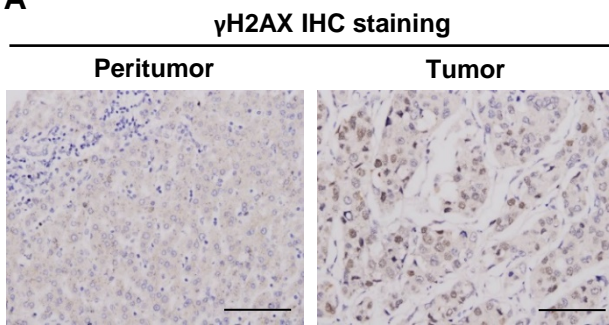

**B**

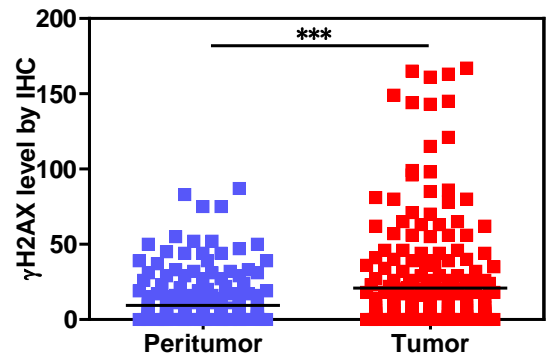

**Appendix Table S1.**  
**Potential peroxisomal substrates of SIRT5-regulated lysine succinylation**

| <b>Protein</b> | <b>Description</b>                          |
|----------------|---------------------------------------------|
| <b>ABCD3</b>   | ATP-binding cassette sub-family D member 3  |
| <b>ACOX1</b>   | Peroxisomal acyl-coenzyme A oxidase 1       |
| <b>ACOX2</b>   | Peroxisomal acyl-coenzyme A oxidase 2       |
| <b>ACSL1</b>   | Long-chain-fatty-acid--CoA ligase 1         |
| <b>AMACR</b>   | Alpha-methylacyl-CoA racemase               |
| <b>CATA</b>    | Catalase                                    |
| <b>DECR2</b>   | Peroxisomal 2,4-dienoyl-CoA reductase       |
| <b>DHB4</b>    | Peroxisomal multifunctional enzyme type 2   |
| <b>DHRS4</b>   | Dehydrogenase/reductase SDR family member 4 |
| <b>ECHP</b>    | Peroxisomal bifunctional enzyme             |
| <b>GSTK1</b>   | Glutathione S-transferase kappa 1           |
| <b>HAOX1</b>   | Hydroxyacid oxidase 1                       |
| <b>HYES</b>    | Bifunctional epoxide hydrolase 2            |
| <b>IDHC</b>    | Isocitrate dehydrogenase [NADP] cytoplasmic |
| <b>NUDT7</b>   | Peroxisomal coenzyme A diphosphatase NUDT7  |
| <b>PAHX</b>    | Phytanoyl-CoA dioxygenase, peroxisomal      |
| <b>PECR</b>    | Peroxisomal trans-2-enoyl-CoA reductase     |
| <b>PRDX5</b>   | Peroxiredoxin-5, mitochondrial              |
| <b>SOX</b>     | Peroxisomal sarcosine oxidase               |
| <b>THIKA</b>   | 3-ketoacyl-CoA thiolase A, peroxisomal      |
| <b>THIKB</b>   | 3-ketoacyl-CoA thiolase B, peroxisomal      |
| <b>URIC</b>    | Uricase                                     |

**Appendix Table S2.**  
**SIRT5 expression is associated with a worse outcome in HCC patients**

| Clinicopathological index     |          | SIRT5 |      | P†   |
|-------------------------------|----------|-------|------|------|
|                               |          | Low   | High |      |
| <b>Sex</b>                    | Female   | 43    | 9    | .303 |
|                               | Male     | 201   | 63   |      |
| <b>Age (year)</b>             | ≤50      | 99    | 26   | .496 |
|                               | >50      | 145   | 46   |      |
| <b>HBsAg</b>                  | Negative | 36    | 7    | .274 |
|                               | Positive | 208   | 65   |      |
| <b>HCV</b>                    | Negative | 242   | 72   | .441 |
|                               | Positive | 2     | 0    |      |
| <b>AFP</b>                    | ≤20      | 85    | 31   | .204 |
|                               | >20      | 159   | 41   |      |
| <b>γ-GT(U/L)</b>              | ≤54      | 129   | 34   | .400 |
|                               | >54      | 115   | 38   |      |
| <b>Liver cirrhosis</b>        | No       | 49    | 12   | .519 |
|                               | Yes      | 195   | 60   |      |
| <b>Tumor number</b>           | Single   | 202   | 58   | .663 |
|                               | Multiple | 42    | 14   |      |
| <b>Tumor size (cm)</b>        | ≤5       | 140   | 44   | .572 |
|                               | >5       | 104   | 28   |      |
| <b>Tumor encapsulation</b>    | complete | 119   | 46   | .024 |
|                               | none     | 125   | 26   |      |
| <b>Microvascular invasion</b> | absence  | 164   | 44   | .337 |
|                               | present  | 80    | 28   |      |
| <b>Tumor differentiation</b>  | I+II     | 179   | 59   | .138 |
|                               | III+IV   | 65    | 13   |      |
| <b>TNM stage</b>              | I        | 139   | 37   | .402 |
|                               | II+III   | 105   | 35   |      |
| <b>BCLC stage</b>             | 0+A      | 132   | 36   | .540 |
|                               | B+C      | 112   | 36   |      |

**Abbreviations:** AFP, α-fetoprotein; γ-GT, γ-glutamyltransferase;  
 TNM, tumor-nodes-metastasis; BCLC, Barcelona Clinic Liver Cancer; HR, hazard ratio;  
 CI, confidential interval; Boldface type indicates significant values.  
 †Cox proportional hazards regression.
