# Supplementary material
Source: PubMed Central journal article supplement (PMC5934778)

# Source Data for Appendix Figures S1, S2, S6, S7, S8

## Source data for Appendix Figure S1

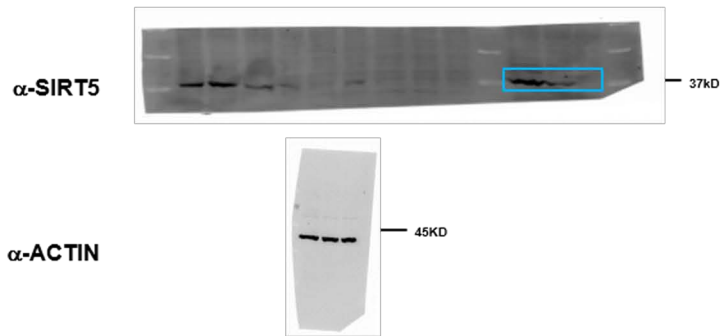

## Source data for Figure S2

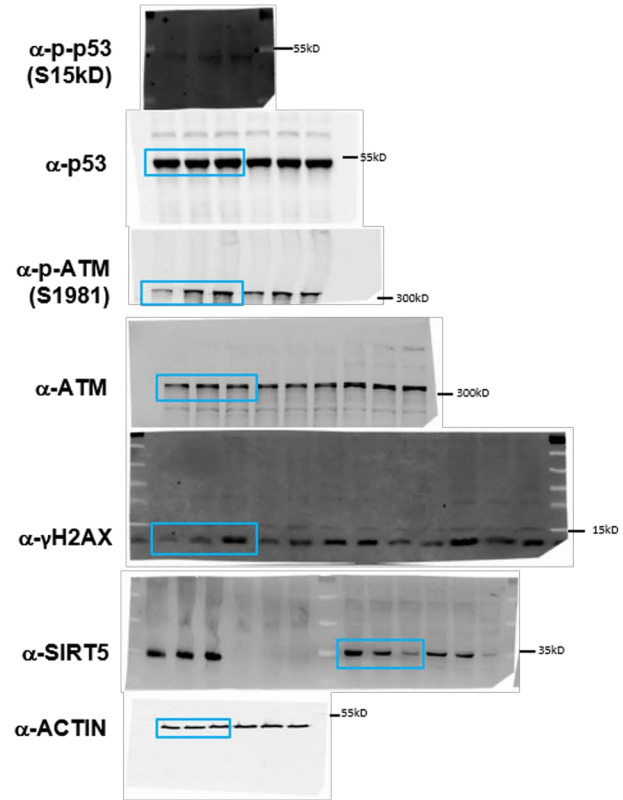

## Source data for Appendix Figure S6

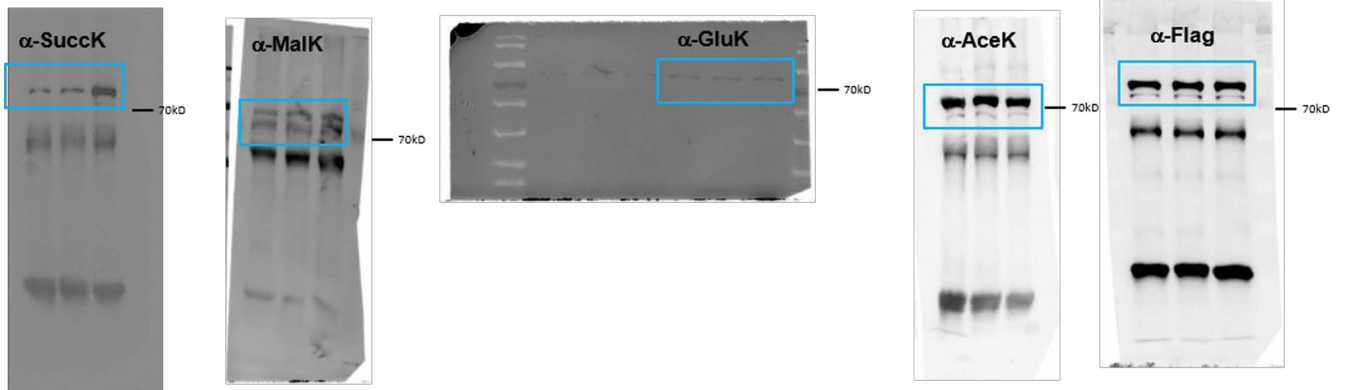

## Source data for Appendix Figure S7

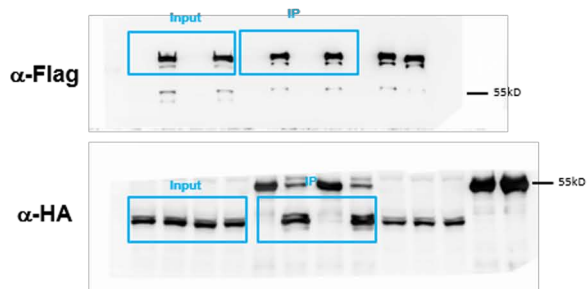

## Source data for Appendix Figure S8

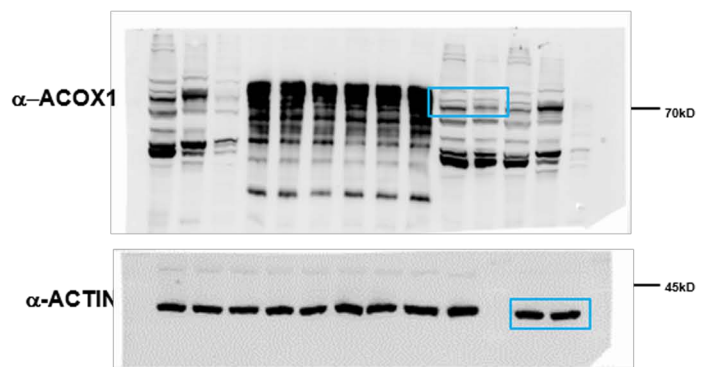

# Source Data for Appendix Figures S11, S13

## Source data for Appendix Figure S11

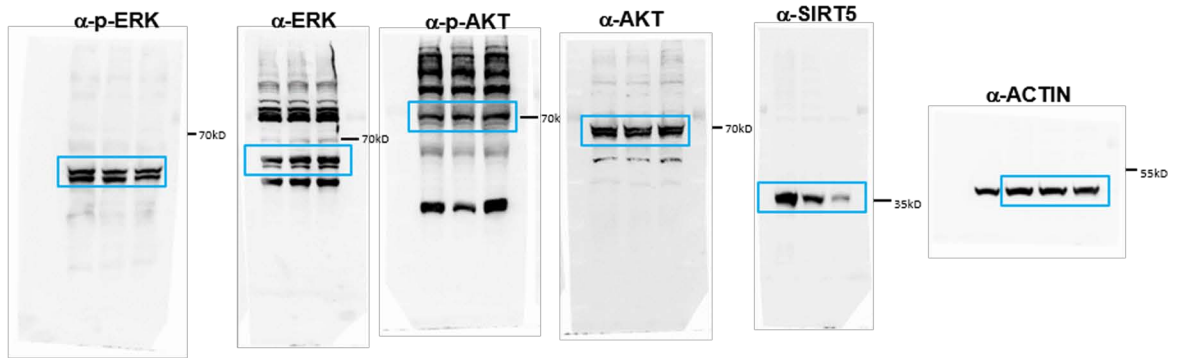

## Source data for Appendix Figure S13

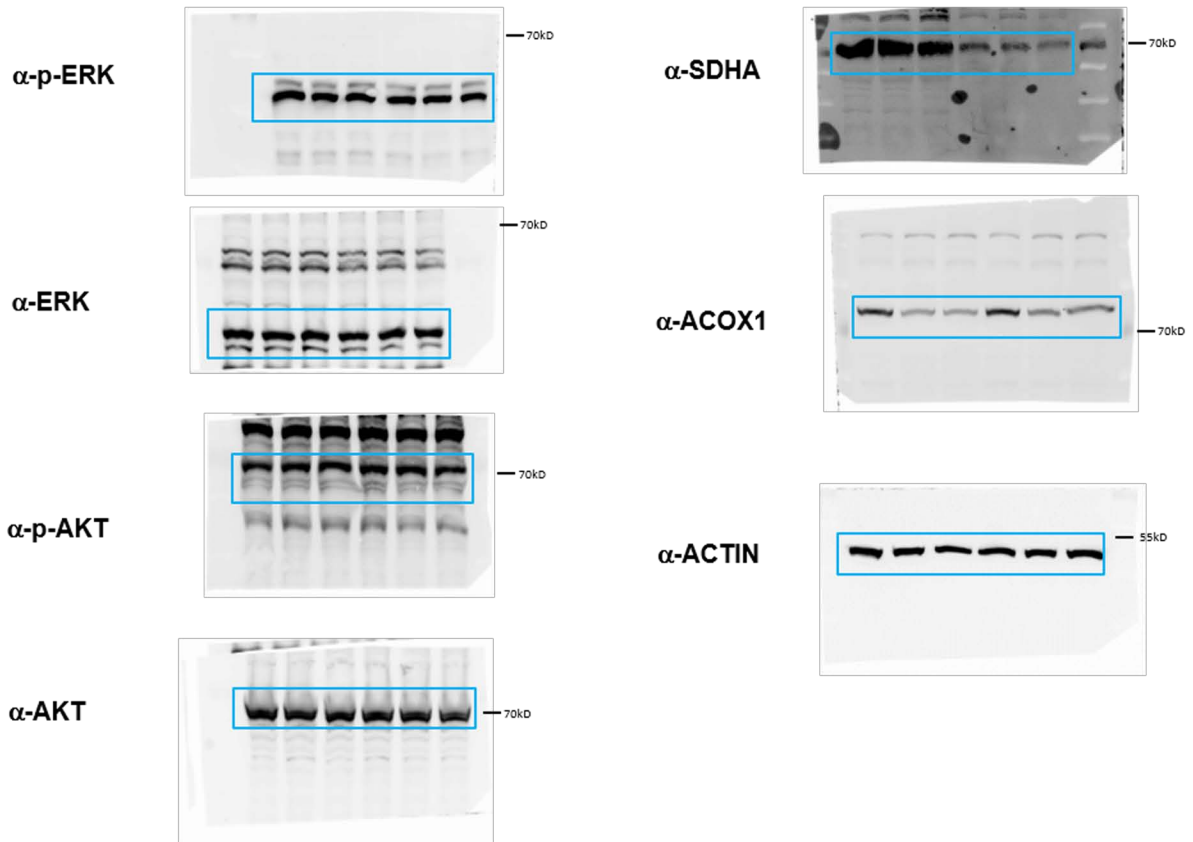

# Source Data for Expanded View

## Source data for Figure EV2B

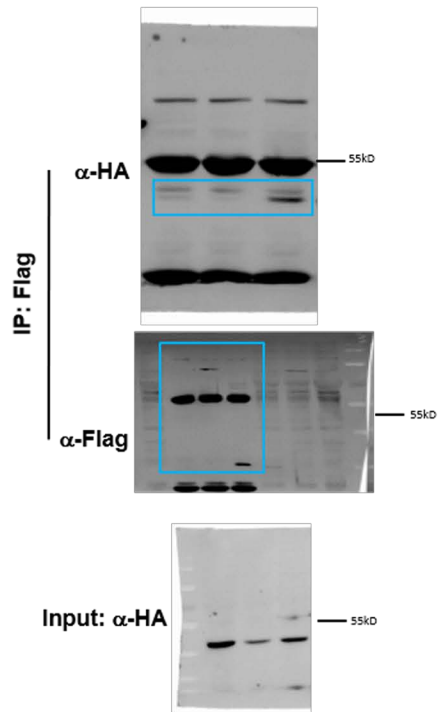

## Source data for Figure EV3A

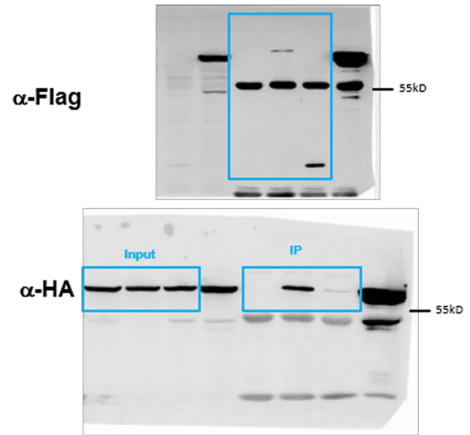

## Source data for Figure EV3B

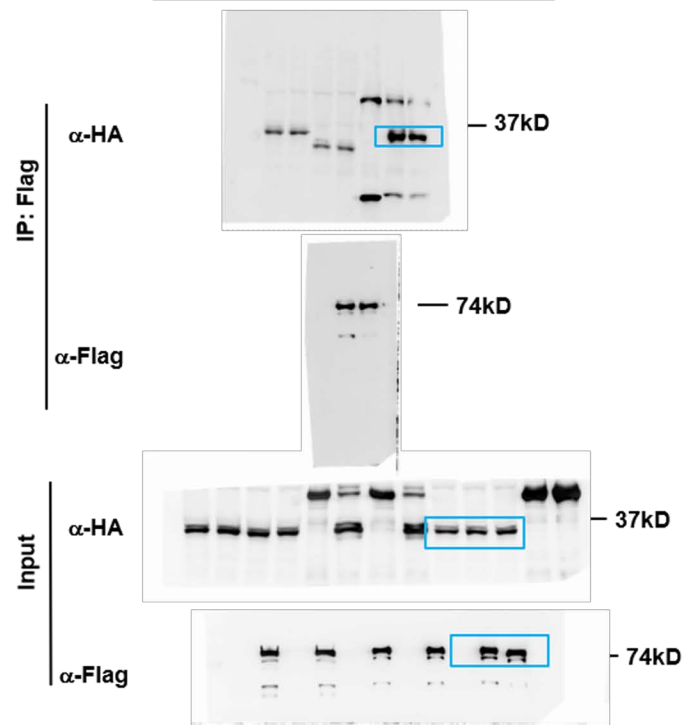

## Source data for Figure EV4C

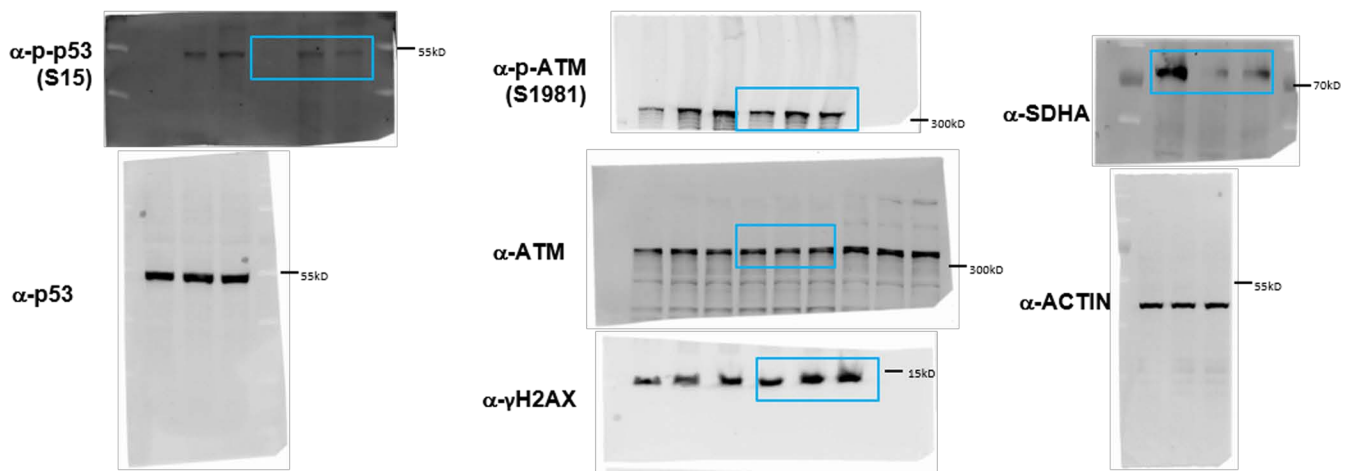

Supplement: EMBR-19-e45124-s009.pdf [file EMBR-19-e45124-s009.pdf]
